# Supplementary material
Source: HighWire-hosted journal article supplement (https://bmjopen.bmj.com/content/12/11/e058437)
Supplement: inline-supplementary-material-1 [file inline-supplementary-material-1.pdf]

## Supplementary file 1

### *Example search string framed by core concepts*

Example from Scopus search, all terms in TITLE-ABS-KEY; Block 1 AND 2 AND 3 AND 4

Block 1 - Spillover pathway (Animal populations and human-animal interface)

Spillover OR "spill over" OR "cross-species transmission" OR poultry OR wildlife OR bushmeat OR "bush meat" OR livestock OR "animal market\*" OR "wet market\*" OR "bird market\*" OR horse\* OR waterfowl OR fowl OR bat OR bats OR mammal\* OR swine OR pig\* OR poaching OR "pet trade" OR pork OR "trade W/5 animal"

Block 2 – Public policy

policy OR law OR legal OR legislat\* OR regulat\* OR tariff OR subsidy OR tax OR ban OR "voluntary agreement" OR incentive OR fiscal OR guidelines OR govern\* OR federal\* OR closure OR closing OR state\* OR "rest day\*" OR "border control\*" OR "habitat protection" OR "wetland protection" OR "supplement\* fed" OR "supplement\* feed\*" OR "market size"

Block 3 – Prevention

Prevent\* OR "ecological intervention\*" OR "non-pharmaceutical intervention\*" OR "public health" OR "risk management" OR "risk minimisation" OR "control strateg\*" OR "outbreak risk" OR "reduc\* W/5 transmission" OR "reduc\* W/5 infection"

Block 4 - Zoonotic pathogens

Zika OR ebola OR covid-19 OR sars-cov-2 OR coronavirus OR sars OR mers OR h1n1 OR h7n9 OR h5n1 OR "one health" OR dengue OR "nipah virus" OR influenza OR zoonoses OR zoonosis OR zoonotic OR "West Nile" OR "HIV/AIDS" OR "avian flu" OR "hendra virus" OR "marburg virus" OR "yellow fever" OR "tick-borne encephalitis" OR "emerging infectious diseases" OR "emergent infectious diseases" OR brucellosis OR rabies OR chikungunya OR "bovine spongiform encephalopathy" OR "rift valley fever"

### *Search strings for all included academic databases*

Scopus search

TITLE-ABS-KEY(Zika OR ebola OR covid-19 OR sars-cov-2 OR coronavirus OR sars OR mers OR h1n1 OR h7n9 OR h5n1 OR "one health" OR dengue OR "nipah virus" OR influenza OR zoonoses OR zoonosis OR zoonotic OR "West Nile" OR "HIV/AIDS" OR "avian flu" OR "hendra virus" OR "marburg virus" OR "yellow fever" OR "tick-borne encephalitis" OR "emerging

infectious diseases" OR "emergent infectious diseases" OR brucellosis OR rabies OR chikungunya OR "bovine spongiform encephalopathy" OR "rift valley fever") AND TITLE-ABS-KEY(Spillover OR "spill over" OR "cross-species transmission" OR poultry OR wildlife OR bushmeat OR "bush meat" OR livestock OR "animal market\*" OR "wet market\*" OR "bird market\*" OR horse\* OR waterfowl OR fowl OR bat OR bats OR mammal\* OR swine OR pig\* OR poaching OR "pet trade" OR pork OR "trade W/5 animal") AND TITLE-ABS-KEY(policy OR law OR legal OR legislat\* OR regulat\* OR tariff OR subsidy OR tax OR ban OR "voluntary agreement" OR incentive OR fiscal OR guidelines OR govern\* OR federal\* OR closure OR closing OR state\* OR "rest day\*" OR "border control\*" OR "habitat protection" OR "wetland protection" OR "supplement\* fed" OR "supplement\* feed\*" OR "market size") AND TITLE-ABS-KEY(Prevent\* OR "ecological intervention\*" OR "non-pharmaceutical intervention\*" OR "public health" OR "risk management" OR "risk minimisation" OR "control strateg\*" OR "outbreak risk" OR "reduc\* W/5 transmission" OR "reduc\* W/5 infection")

#### Medline search

((Zika[Title/Abstract] OR ebola[Title/Abstract] OR covid-19[Title/Abstract] OR sars-cov-2[Title/Abstract] OR coronavirus[Title/Abstract] OR sars[Title/Abstract] OR mers[Title/Abstract] OR h1n1[Title/Abstract] OR h7n9[Title/Abstract] OR h5n1[Title/Abstract] OR "one health"[Title/Abstract] OR dengue[Title/Abstract] OR "nipah virus"[Title/Abstract] OR influenza[Title/Abstract] OR zoonoses[Title/Abstract] OR zoonosis[Title/Abstract] OR zoonotic[Title/Abstract] OR "West Nile"[Title/Abstract] OR "HIV/AIDS"[Title/Abstract] OR "avian flu"[Title/Abstract] OR "hendra virus"[Title/Abstract] OR "marburg virus"[Title/Abstract] OR "yellow fever"[Title/Abstract] OR "tick-borne encephalitis"[Title/Abstract] OR "emerging infectious diseases"[Title/Abstract] OR "emergent infectious diseases"[Title/Abstract] OR brucellosis[Title/Abstract] OR rabies[Title/Abstract] OR chikungunya[Title/Abstract] OR "bovine spongiform encephalopathy"[Title/Abstract] OR "rift valley fever"[Title/Abstract] OR zoonoses [mesh]) AND (Spillover[Title/Abstract] OR "spill over"[Title/Abstract] OR "cross-species transmission"[Title/Abstract] OR poultry[Title/Abstract] OR wildlife[Title/Abstract] OR bushmeat[Title/Abstract] OR "bush meat"[Title/Abstract] OR livestock[Title/Abstract] OR "animal market"[Title/Abstract] OR "animal markets"[Title/Abstract] OR "wet market"[Title/Abstract] OR "wet markets"[Title/Abstract] OR "bird market"[Title/Abstract] OR "bird markets"[Title/Abstract] OR horse[Title/Abstract] OR horses[Title/Abstract] OR waterfowl[Title/Abstract] OR fowl[Title/Abstract] OR bat[Title/Abstract] OR bats[Title/Abstract] OR mammal[Title/Abstract] OR

mammals[Title/Abstract] OR mammalian[Title/Abstract] OR swine[Title/Abstract] OR pig[Title/Abstract] OR pigs[Title/Abstract] OR poaching[Title/Abstract] OR "pet trade"[Title/Abstract] OR pork[Title/Abstract] OR animal N5 trade[Title/Abstract] OR disease reservoir [mesh]) AND (policy[Title/Abstract] OR law[Title/Abstract] OR legal[Title/Abstract] OR legislation[Title/Abstract] OR legislative[Title/Abstract] OR legislating[Title/Abstract] OR regulation[Title/Abstract] OR regulations[Title/Abstract] OR regulatory[Title/Abstract] OR tariff[Title/Abstract] OR subsidy[Title/Abstract] OR tax[Title/Abstract] OR ban[Title/Abstract] OR "voluntary agreement"[Title/Abstract] OR incentive[Title/Abstract] OR fiscal[Title/Abstract] OR guidelines[Title/Abstract] OR government[Title/Abstract] OR governments[Title/Abstract] OR federal[Title/Abstract] OR federally[Title/Abstract] OR closure[Title/Abstract] OR closing[Title/Abstract] OR state[Title/Abstract] OR "rest day"[Title/Abstract] OR "rest days"[Title/Abstract] OR "border control"[Title/Abstract] OR "border controls"[Title/Abstract] OR "habitat protection"[Title/Abstract] OR "wetland protection"[Title/Abstract] OR "supplemental feeding"[Title/Abstract] OR "market size"[Title/Abstract]) AND (Prevent[Title/Abstract] OR prevention[Title/Abstract] OR "ecological intervention"[Title/Abstract] OR "ecological interventions"[Title/Abstract] OR "non-pharmaceutical intervention"[Title/Abstract] OR "non-pharmaceutical interventions"[Title/Abstract] OR "public health"[Title/Abstract] OR "risk management"[Title/Abstract] OR "risk minimisation"[Title/Abstract] OR "control strategy"[Title/Abstract] OR "control strategies"[Title/Abstract] OR "outbreak risk"[Title/Abstract] OR reducing N5 transmission[Title/Abstract] OR reducing N5 infection[Title/Abstract])

#### Web of knowledge search

AB=(Zika OR ebola OR covid-19 OR sars-cov-2 OR coronavirus OR sars OR mers OR h1n1 OR h7n9 OR h5n1 OR "one health" OR dengue OR "nipah virus" OR influenza OR zoonoses OR zoonosis OR zoonotic OR "West Nile" OR "HIV/AIDS" OR "avian flu" OR "hendra virus" OR "marburg virus" OR "yellow fever" OR "tick-borne encephalitis" OR "emerging infectious diseases" OR "emergent infectious diseases" OR brucellosis OR rabies OR chikungunya OR "bovine spongiform encephalopathy" OR "rift valley fever")

AND

AB=(Spillover OR "spill over" OR "cross-species transmission" OR poultry OR wildlife OR bushmeat OR "bush meat" OR livestock OR "animal market\*" OR "wet market\*" OR "bird

market\*\* OR horse\* OR waterfowl OR fowl OR bat OR bats OR mammal\* OR swine OR pig\* OR poaching OR "pet trade" OR pork OR trade NEAR animal)

AND

AB=(policy OR law OR legal OR legislat\* OR regulat\* OR tariff OR subsidy OR tax OR ban OR "voluntary agreement" OR incentive OR fiscal OR guidelines OR govern\* OR federal\* OR closure OR closing OR state\* OR "rest day\*" OR "border control\*" OR "habitat protection" OR "wetland protection" OR "supplement\* fed" OR "supplement\* feed\*" OR "market size")

AND

AB=(Prevent\* OR "ecological intervention\*" OR "non-pharmaceutical intervention\*" OR "public health" OR "risk management" OR "risk minimisation" OR "control strateg\*" OR "outbreak risk" OR reduc\* NEAR transmission OR reduc\* NEAR infection)

Ovid Global Health database search (all in abstract)

Zika OR ebola OR covid-19 OR sars-cov-2 OR coronavirus OR sars OR mers OR h1n1 OR h7n9 OR h5n1 OR one health OR dengue OR nipah virus OR influenza OR zoonoses OR zoonosis OR zoonotic OR West Nile OR HIV/AIDS OR avian flu OR hendra virus OR marburg virus OR yellow fever OR tick-borne encephalitis OR emerging infectious diseases OR emergent infectious diseases OR brucellosis OR rabies OR chikungunya OR bovine spongiform encephalopathy OR rift valley fever

AND

Spillover OR spill over OR cross-species transmission OR poultry OR wildlife OR bushmeat OR bush meat OR livestock OR animal market\* OR wet market\* OR bird market\* OR horse\* OR waterfowl OR fowl OR bat OR bats OR mammal\* OR swine OR pig\* OR poaching OR pet trade OR pork OR (trade adj5 animal)

AND

policy OR law OR legal OR legislat\* OR regulat\* OR tariff OR subsidy OR tax OR ban OR voluntary agreement OR incentive OR fiscal OR guidelines OR govern\* OR federal\* OR closure OR closing OR state\* OR rest day\* OR border control\* OR habitat protection OR wetland protection OR supplement\* fed OR supplement\* feed\* OR market size

AND

Prevent\* OR ecological intervention\* OR non-pharmaceutical intervention\* OR public health OR risk management OR risk minimisation OR control strateg\* OR outbreak risk OR (reduc\* adj5 transmission) OR (reduc\* adj5 infection)

*List of organization websites searched for grey literature*

1. World Organization for Animal Health (formerly OIE)
2. Food and Agriculture Organization
3. World Health Organization
4. Wildlife Disease Association
5. International Alliance against Health Risks in WildlifeTrade
6. United Nations Environment Program
7. United Nations Office for Drugs and Crime
8. Global Alliance for Rabies Control
9. EcoHealth Alliance
10. Network for EcoHealth and One Health
11. International Livestock Research Institute
12. Preventing Pandemics at the Source
13. World Veterinary Association
14. CITES
15. TRAFFIC
16. One Health Commission
17. World Wildlife Fund
18. World Trade Organization
